# Supplementary material for: Simple and rapid screening of the thiocyanate level in saliva for the identification of smokers and non-smokers by capillary electrophoresis with contactless conductivity detection
Source: Royal Society of Chemistry journal article supplement (doi:10.1039/c6ay01460g), 2016-01-01
Supplement: c6ay01460g1.pdf [file c6ay01460g1.pdf]

## Electronic Supplementary Material

**Table S1** Analytical methods of thiocyanate analysis in various biological samples (urine, blood, plasma and saliva) with summary of developed method, sample preparation.

| Method development                                   | Sample | Sample preparation                                                                                         |
|------------------------------------------------------|--------|------------------------------------------------------------------------------------------------------------|
| <b><i>Colorimetry</i></b>                            |        |                                                                                                            |
| Spectrophotometer <sup>13</sup>                      | Urine  | Solid phase extraction and König reaction                                                                  |
| Spectrophotometer <sup>14</sup>                      | Saliva | Colorimetric reaction with ferric nitrate                                                                  |
| <b><i>Chromatography</i></b>                         |        |                                                                                                            |
| HPLC-UV <sup>6</sup>                                 | Urine  | Centrifugation and König reaction                                                                          |
| HPLC-FL <sup>15</sup>                                | Plasma | König reaction                                                                                             |
| IC-UV-FL <sup>10</sup>                               | Blood  | Liquid-liquid extraction with methanol and fluorescence derivatization with NDA and taurine                |
| GC-MS <sup>5</sup>                                   | Plasma | Liquid-liquid extraction with ethyl acetate and the reaction of thiocyanate with pentafluorobenzyl bromide |
| GC-NPD <sup>16</sup>                                 | Saliva | Headspace                                                                                                  |
| GC-MS <sup>17</sup>                                  | Saliva | Derivatization and headspace                                                                               |
| GC-MS <sup>7</sup>                                   | Saliva | Derivatization and headspace                                                                               |
| <b><i>Capillary electrophoresis</i></b>              |        |                                                                                                            |
| CE-UV <sup>3</sup>                                   | Saliva | Dilution and deproteinised with acetonitrile                                                               |
| CE-UV <sup>18</sup>                                  | Saliva | A transient isotachopheresis (in-line pre-concentration)                                                   |
| CE-UV <sup>19</sup>                                  | Saliva | Counter flow isotachopheretic stacking (in-line pre-concentration)                                         |
| CE- contactless conductivity detection <sup>25</sup> | Saliva |                                                                                                            |

| Method development                                              | Sample | Sample preparation                                             |
|-----------------------------------------------------------------|--------|----------------------------------------------------------------|
|                                                                 |        | Field amplified sample injection<br>(Online pre-concentration) |
| <b><i>Flow based method</i></b>                                 |        |                                                                |
| <i>FIA</i> <sup>20</sup>                                        | Serum  | Dilution and dialysis                                          |
| <i>DV-SIA</i> <sup>21</sup>                                     | Saliva | Online liquid-liquid extraction                                |
| <i>SIA-ISE</i> <sup>22</sup>                                    | Saliva | Dilution                                                       |
| <b><i>Electrospray-ionization ion mobility spectrometry</i></b> |        |                                                                |
| <i>ESI-IMS</i> <sup>26</sup>                                    | Saliva | Dilution                                                       |

FL; Fluorescence detection, NPD; Nitrogen phosphorus detector, NDA; 2,3-Naphthalenedialdehyde
